# Supplementary material for: Partial Substitution of Meat with Insect (Alphitobius diaperinus) in a Carnivore Diet Changes the Gut Microbiome and Metabolome of Healthy Rats
Source: Foods. 2021 Aug 5;10(8):1814. doi: 10.3390/foods10081814 (PMC8393340; doi:10.3390/foods10081814)
Supplement: Supplementary file 1 [file foods-10-01814-s001.zip › foods-1311373-SI.pdf]

## Supplementary material

*Table S1: Formulation of sausages diets. Ingredients added to common sausage emulsion of pork meat, pork fat and water*

|                                    | Pork sausage | Insect-substituted pork sausage |
|------------------------------------|--------------|---------------------------------|
| Sunflower oil [mL/kg]              | 62.4         | 65.8                            |
| NaCl [g/kg]                        | 11.2         | 11.8                            |
| Phosphor [g/kg]                    | 4.7          | 4.9                             |
| NaNO <sub>2</sub> [g/kg]           | 7.5          | 7.9                             |
| AIN76 mineral mix (TD79055) [g/kg] | 18.7         | 19.7                            |
| AIN76 vitamin mix (CA40077) [g/kg] | 5.9          | 6.2                             |
| Insect protein isolate [g/kg]      | -            | 131.6                           |

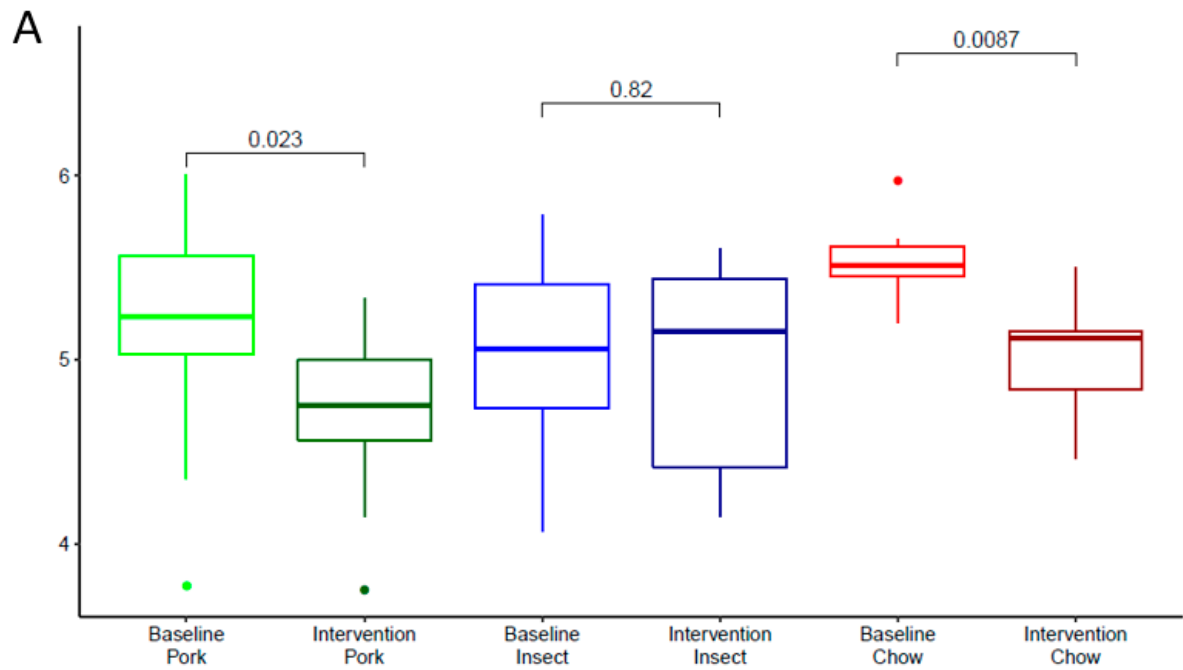

**B**

| Shannon index                           |        |
|-----------------------------------------|--------|
|                                         | H'     |
| Baseline pork - intervention pork       | 0.023  |
| Baseline insect - intervention insect   | 0.82   |
| Baseline chow - intervention chow       | 0.0087 |
| Intervention pork - intervention insect | 0.25   |
| Intervention pork - intervention chow   | 0.12   |
| Intervention insect - intervention chow | 0.96   |

**Figure S1: Alfa diversity of the gut microbiota composition at baseline and after the tree intervention diets.** The Shannon index at baseline and after diet intervention (4 weeks) with either pork sausage diet, insect-substituted pork diet or chow diet (A). Statistical values of Shannon index for all comparisons (B).

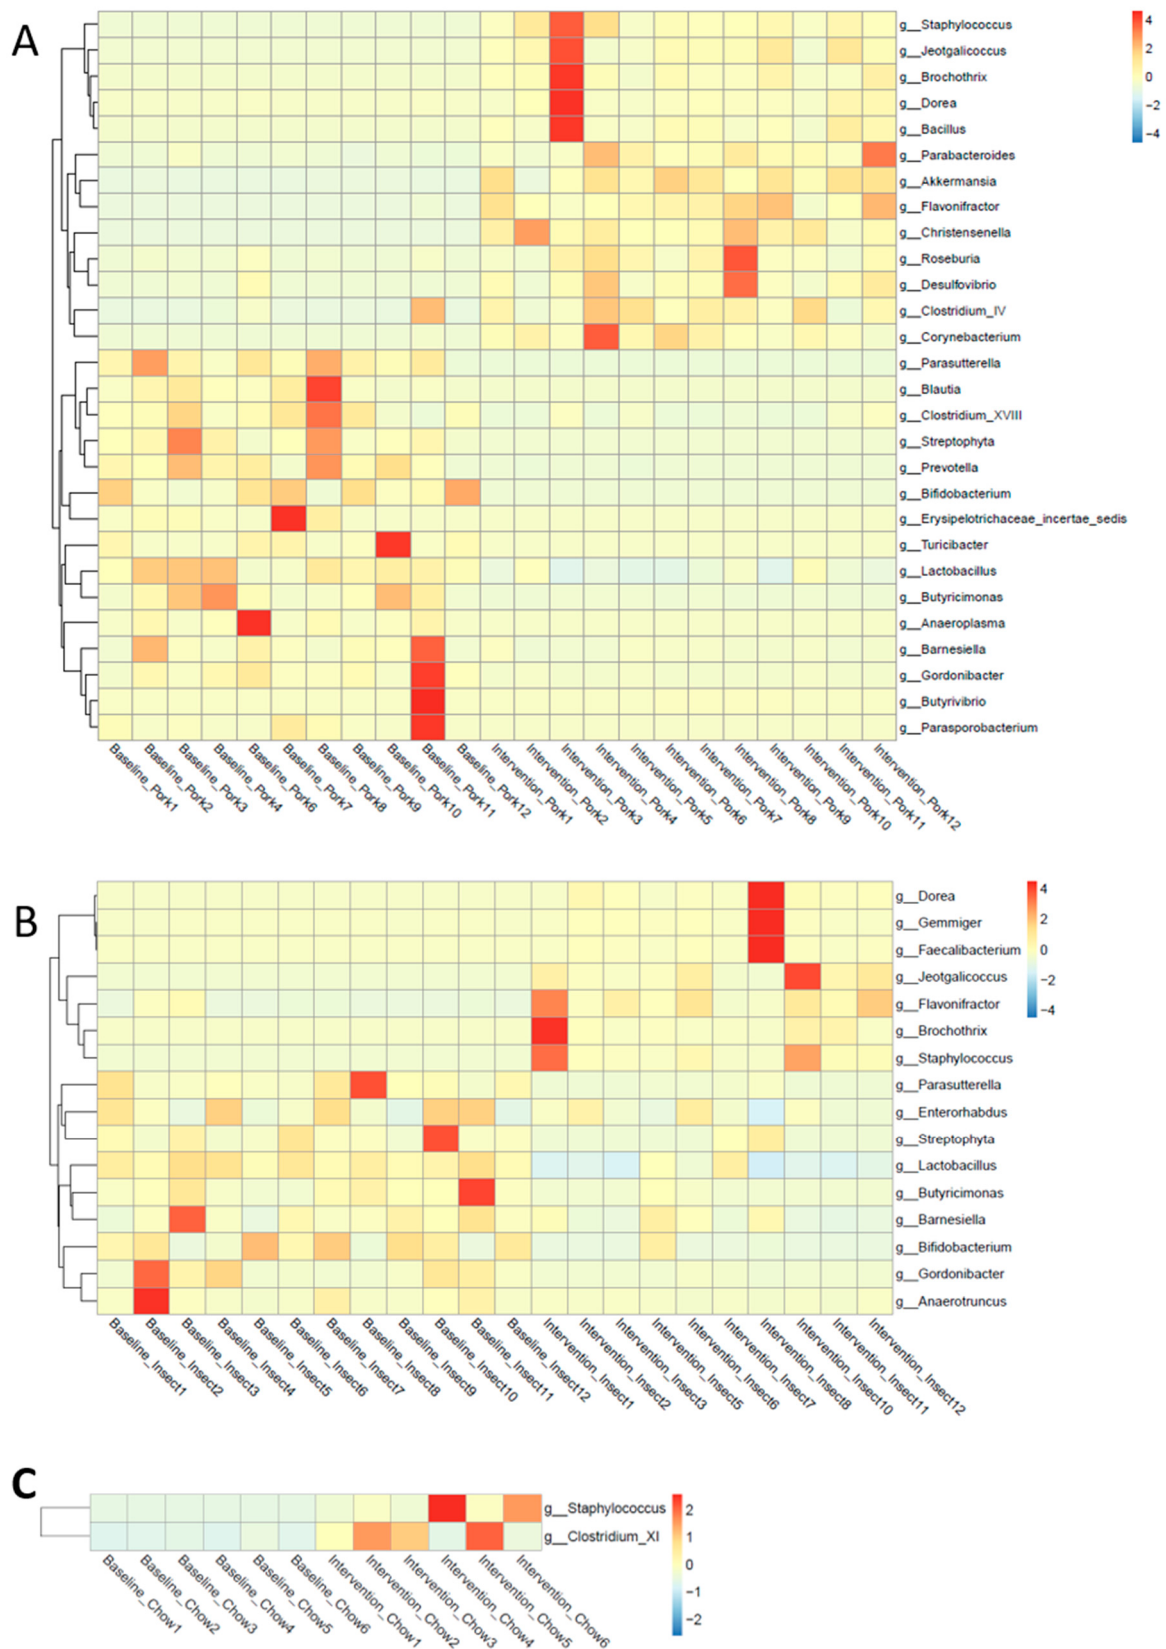

**Figure S2: Change in abundance of different bacterial genera in the gut microbiota after diet intervention.** The abundance at genus level are shown before (baseline) and after the different diet interventions (Intervention) with (A) pork sausage (pork), (B) insect-supplemented pork sausage (insect) or (C) chow diet (chow).

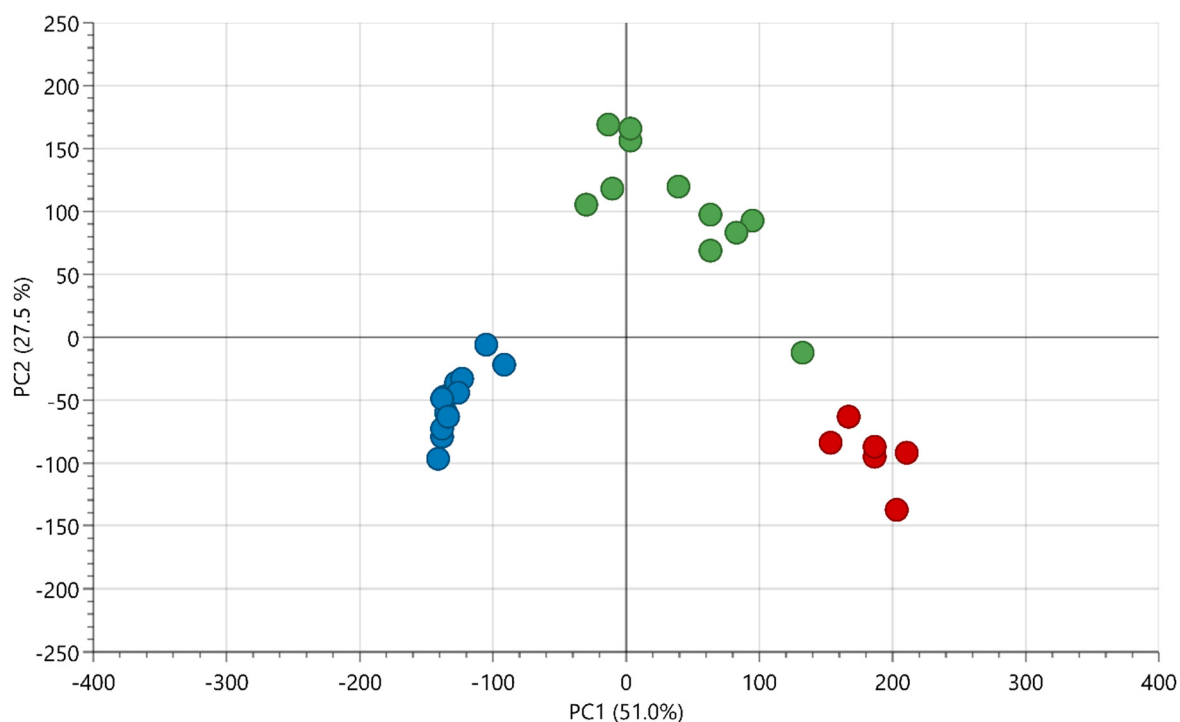

**Figure S3: Score plot of principal component analysis of stomach content.** The first two principal components of rats on chow diet (red), pork sausage diet (blue) or insect-substituted pork sausage diet (green). The first principal component(PC) explaining 51 % of the total variance separates the groups and by also taking the second component, explaining 27.5 % of the variance, into account a clear separation is observed between the three groups.

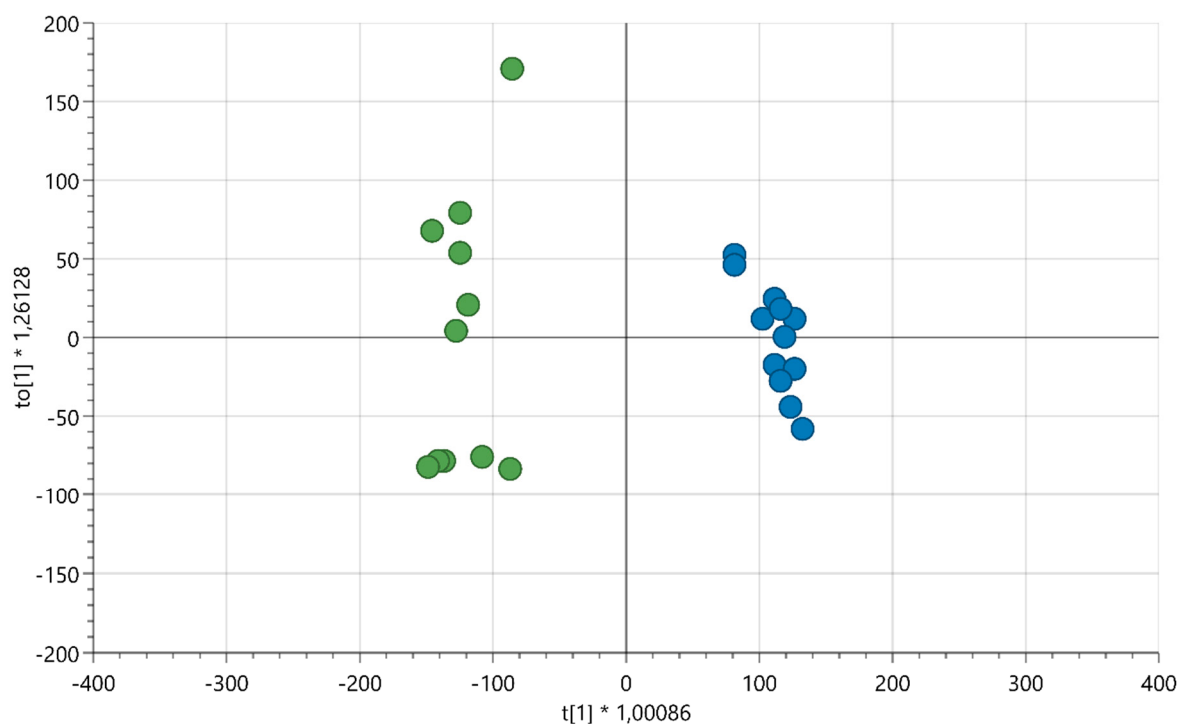

**Figure S4: Score plot of OPLS-DA of stomach content of rats on insect-substituted pork sausage diet (green) versus pork sausage diet (blue).**  $Q^2=0.96$ .

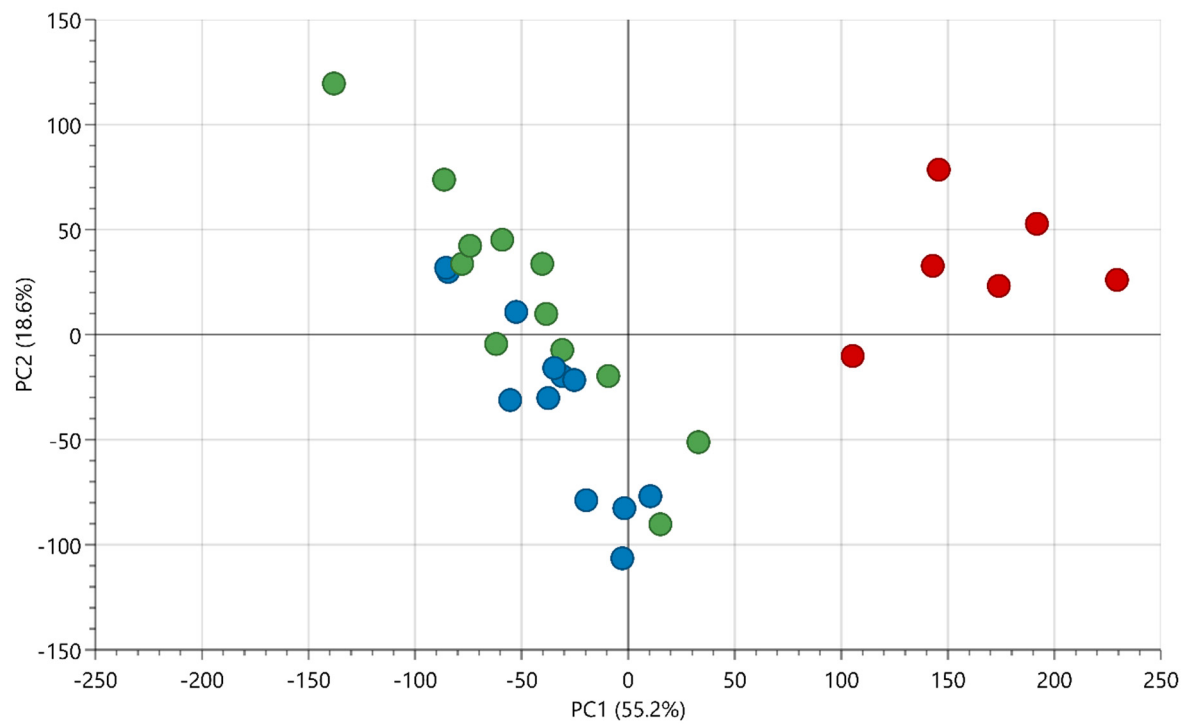

**Figure S5: Score plot of principal component analysis of small intestinal content.** The first two of three principal components of rats on chow diet (red), pork sausage diet (green) or insect-substituted pork sausage diet (blue). The first principal component (PC) (55.2 %) separates the chow group from the others while the pork and insect diet groups are separated along both PC1 and PC2 (18.6 %).

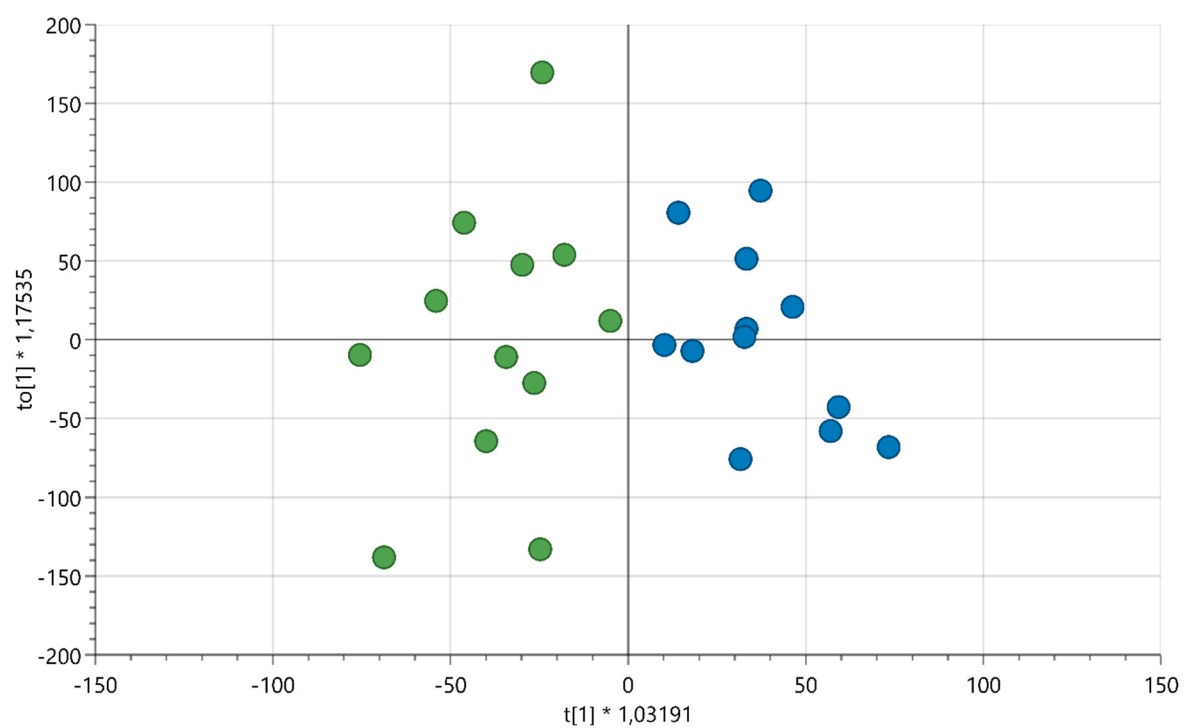

**Figure S6:** Score plot of orthogonal partial least squares discriminant analysis of small intestinal content of rats on pork diet (green) versus insect-substituted pork sausage diet (blue).  $Q^2=0.67$ .

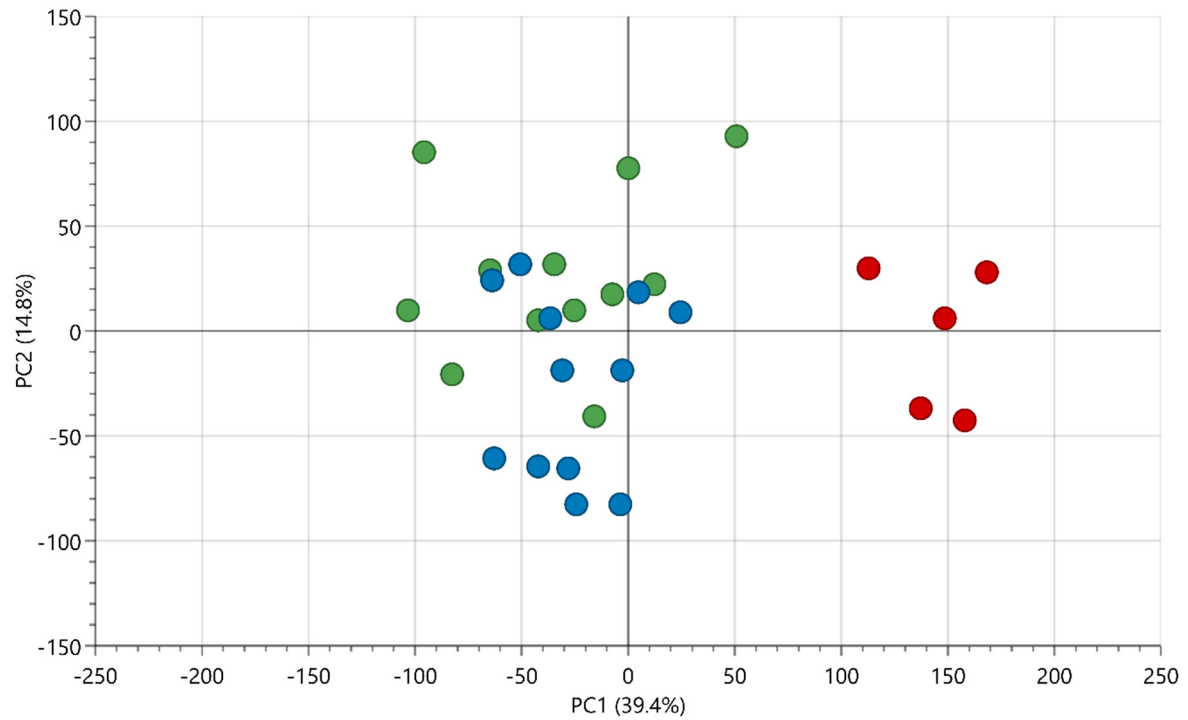

**Figure S7: Score plot of principal component analysis of colon content.** Score plot of principal component analysis with 7 principal components displaying the two first components of colon content of rats on chow diet (red), pork sausage diet (green) or insect-substituted pork sausage diet (blue). The first principal component (PC) (39.4 %) separates the chow samples from the other groups while PC2 (14.8 %) separates the pork from the insect group.

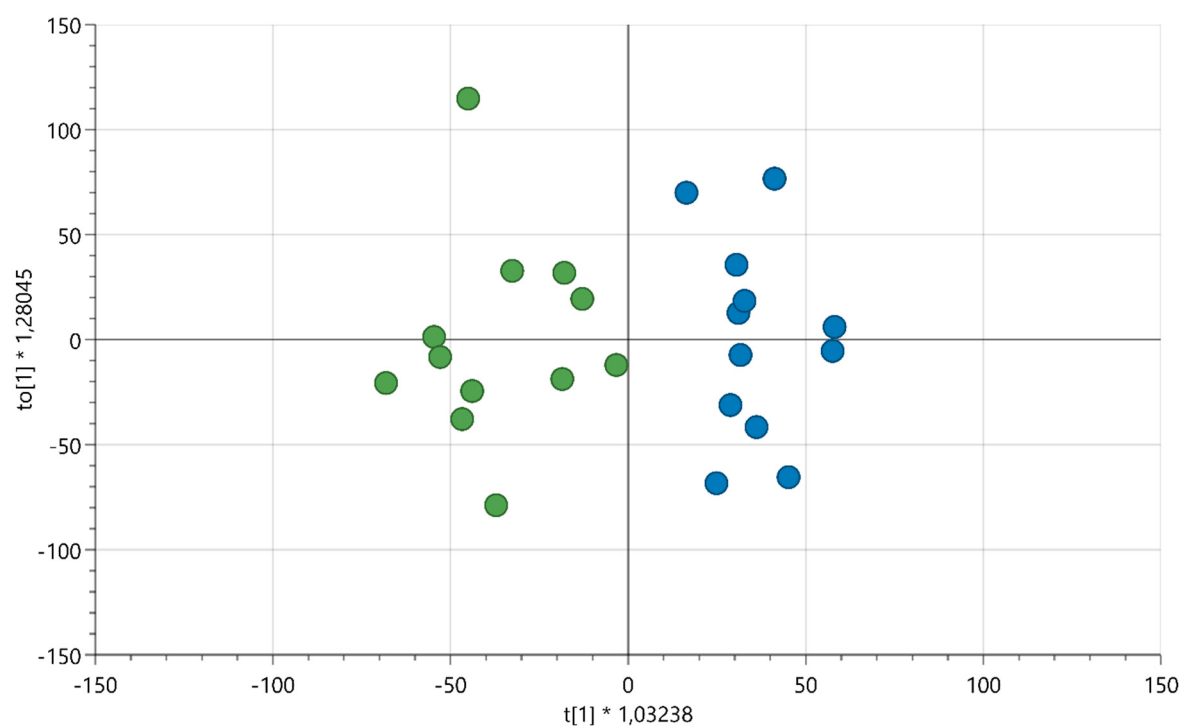

**Figure S8:** Score plot of OPLS-DA of colon content of rats on pork diet (green) versus insect-substituted pork sausage diet (blue).  $Q^2=0.59$ .
